# Supplementary material for: Investigation into the mechanism of polyoxotungstates-catalyzed cyclooctene epoxidation by ESI-MS
Source: Royal Society of Chemistry journal article supplement (doi:10.1039/c6ra09561e), 2016-01-01
Supplement: c6ra09561e1.pdf [file c6ra09561e1.pdf]

# Investigation into the mechanism of polyoxotungstates-catalyzed cyclooctene epoxidation by ESI-MS

LinYuan Fan, YaYu Hong, Jie Cao\* and ChangWen Hu\*

*Key Laboratory of Cluster Science, Ministry of Education of China; Beijing Key Laboratory of Photoelectronic/Electrophotonic Conversion Materials; School of Chemistry, Beijing Institute of Technology, Beijing 100081, P.R. China.*

*E-mail: [jcao@not.edi.cn](mailto:jcao@not.edi.cn), [cwhu@bit.edu.cn](mailto:cwhu@bit.edu.cn)*

## Supporting Information

### Contents

**Fig. S1** GC spectra of the epoxidation reaction of cyclooctene by adding different amount of catalyst **1**.

**Fig. S2** GC spectra of the epoxidation reaction of cyclooctene by adding different amount of catalyst **2**.

**Fig. S3** The comparison of MS spectra of  $[\text{HW}_2(\text{O}_2)_2\text{O}_5(\text{C}_8\text{H}_{14}\text{O})_2]^-$  ( $m/z$  765.1).

**Fig. S4** MS spectra of catalytic solution of 1,2-epoxycyclooctane after the reaction with  $\text{H}_2\text{O}_2$  and catalysts.

**Fig. S5** CID mass spectra of  $[\text{HW}_2(\text{O}_2)_2\text{O}_5(\text{C}_8\text{H}_{14}\text{O})_2]^-$  generated from different reaction solution.

**Fig. S6** Real-time monitoring on the cyclooctene epoxidation by one-step for catalyst **1**.

**Fig. S7** Real-time monitoring on the cyclooctene epoxidation by one-step for catalyst **2**.

**Fig. S8** The comparison of MS spectra of  $[\text{PW}_4\text{O}_{16-x}(\text{O}_2)_x]^-$ .

**Fig. S9** The conversion-time curve of cyclooctene in system **1**.

**Fig. S10** The conversion-time curve of cyclooctene in system **2**.

---

\* Corresponding author.

*E-mail address:* [jcao@bit.edu.cn](mailto:jcao@bit.edu.cn)

*E-mail address:* [cwhu@bit.edu.cn](mailto:cwhu@bit.edu.cn)

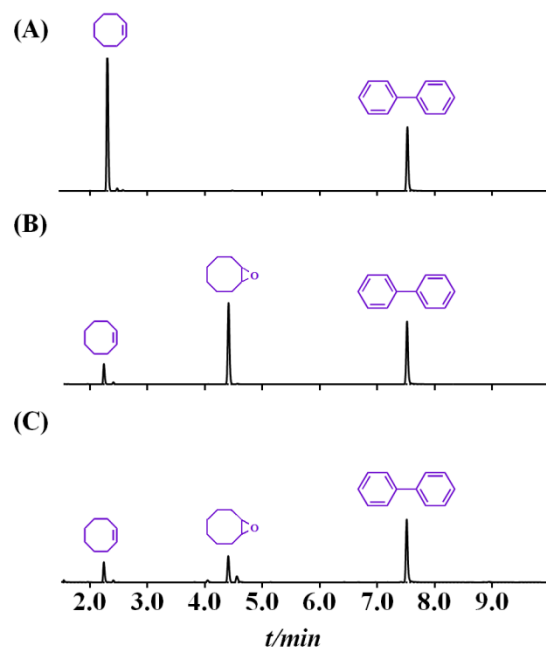

**Fig. S1** GC spectra of the epoxidation reaction of cyclooctene by adding different amount of catalyst **1** ( $\text{H}_3\text{PW}_{12}\text{O}_{40}$ ). Reaction conditions: cyclooctene (1 mmol),  $\text{H}_2\text{O}_2$  (1 mmol),  $\text{CH}_3\text{CN}$  solvent (2 mL), 50 °C, 4 h. (A) without catalyst **1**; (B) 0.005 mmol catalyst **1**; (C) 0.1 mmol catalyst **1**.

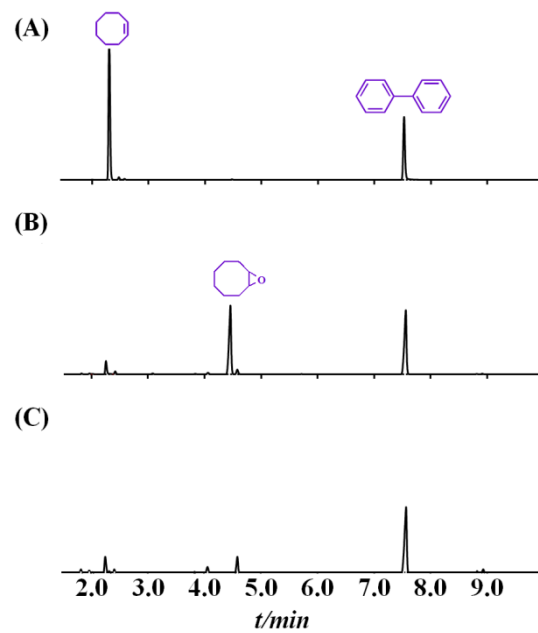

**Fig. S2** GC spectra of the epoxidation reaction of cyclooctene by adding different amount of catalyst **2** ( $\text{H}_2\text{WO}_4$ ). Reaction conditions: cyclooctene (1 mmol),  $\text{H}_2\text{O}_2$  (1 mmol),  $\text{CH}_3\text{CN}$  solvent (2 mL), 50 °C. (A) without catalyst **2**; (B) 0.06 mmol catalyst **2**; (C) 1.2 mmol catalyst **2**.

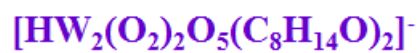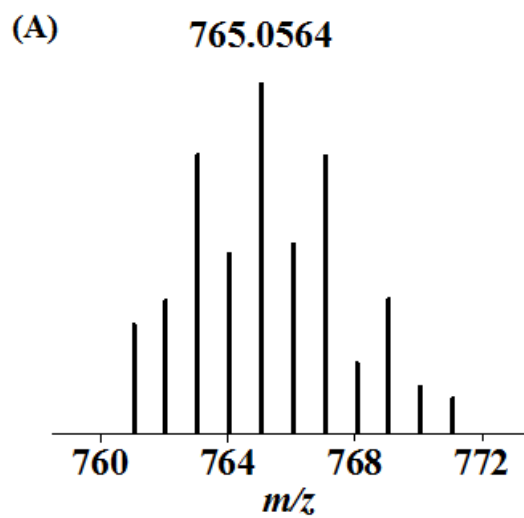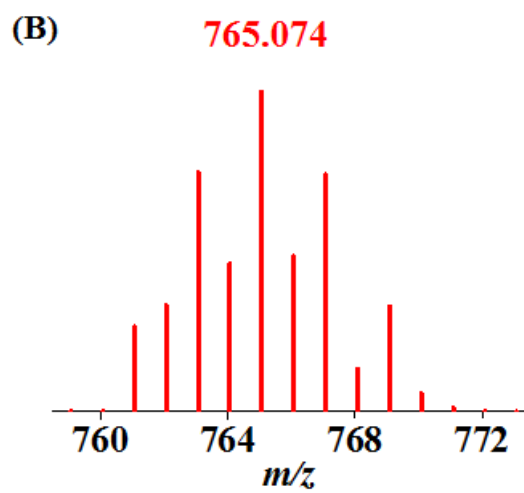

**Fig. S3** The comparison of MS spectra of  $[\text{HW}_2(\text{O}_2)_2\text{O}_5(\text{C}_8\text{H}_{14}\text{O})_2]^-$  ( $m/z$  765.1). (A) Observed; (B) Calculated.

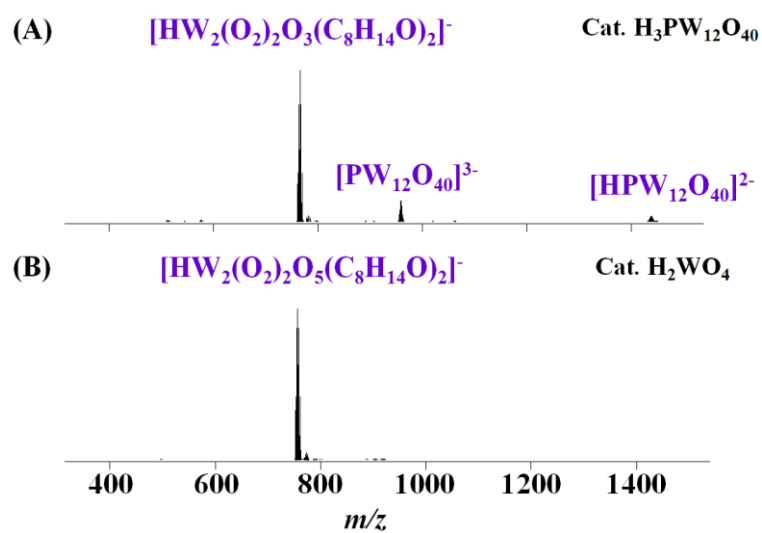

**Fig. S4** MS spectra of catalytic solution of 1,2-epoxycyclooctane after the reaction with H<sub>2</sub>O<sub>2</sub> and catalysts. Reaction conditions: 1,2-epoxycyclooctane (1 mmol), H<sub>2</sub>O<sub>2</sub> (1 mmol), CH<sub>3</sub>CN solvent (2 mL), 50 °C, 4h. (A) H<sub>3</sub>PW<sub>12</sub>O<sub>40</sub> (0.005 mmol) as catalyst; (B) H<sub>2</sub>WO<sub>4</sub> (0.06 mmol) as catalyst.

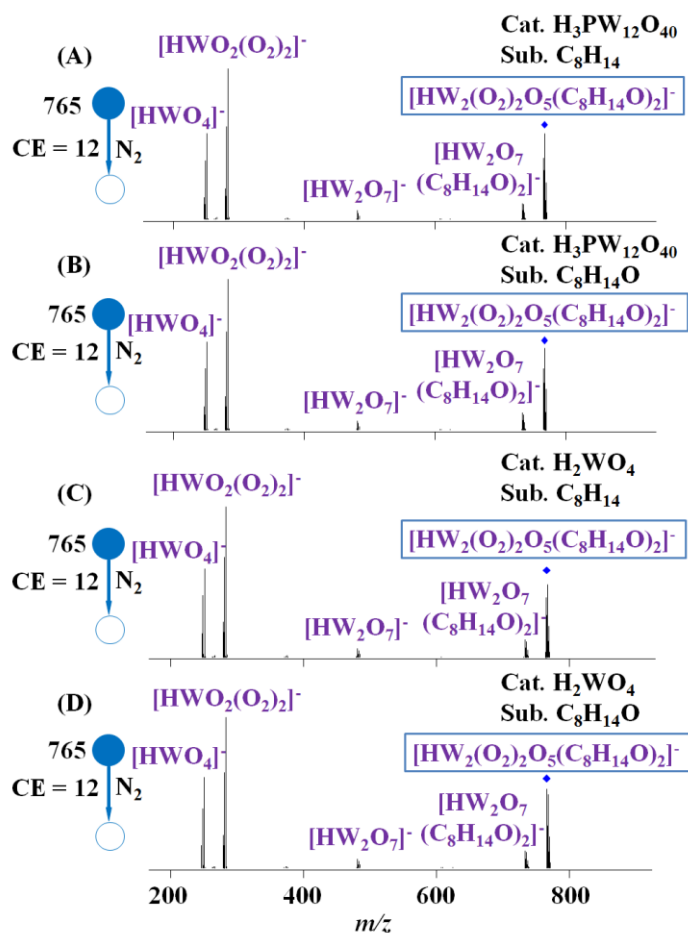

**Fig. S5** CID mass spectra of  $[\text{HW}_2(\text{O}_2)_2\text{O}_5(\text{C}_8\text{H}_{14}\text{O})_2]^-$  generated from different reaction solution. (A)  $\text{H}_3\text{PW}_{12}\text{O}_{40}$  (0.005 mmol) as catalyst, cyclooctene (1 mmol) as substrate,  $\text{H}_2\text{O}_2$  (1 mmol); (B)  $\text{H}_3\text{PW}_{12}\text{O}_{40}$  (0.005 mmol) as catalyst, 1,2-epoxycyclooctane (1 mmol) as substrate,  $\text{H}_2\text{O}_2$  (1 mmol); (C)  $\text{H}_2\text{WO}_4$  (0.06 mmol) as catalyst, cyclooctene (1 mmol) as substrate,  $\text{H}_2\text{O}_2$  (1 mmol); (D)  $\text{H}_2\text{WO}_4$  (0.06 mmol) as catalyst, 1,2-epoxycyclooctane (1 mmol) as substrate,  $\text{H}_2\text{O}_2$  (1 mmol). Collision energy = 12 eV, Isolation width = 9. The parent ion (denoted by a diamond) is shown in a blue square box in each spectrum.

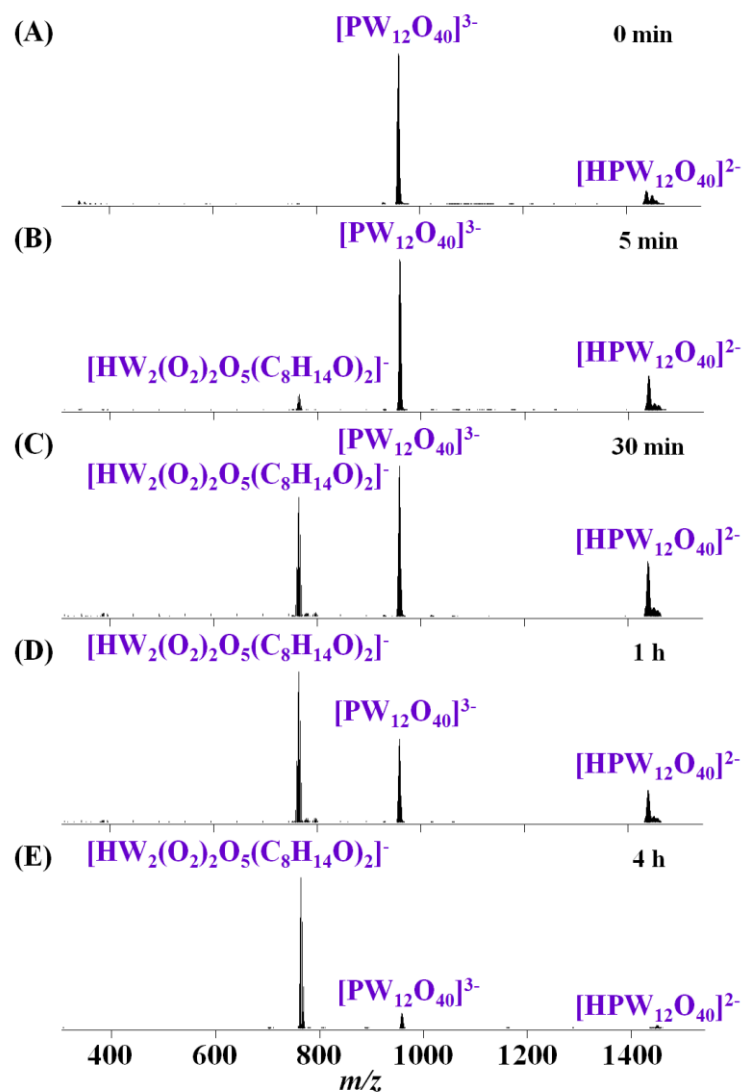

**Fig. S6** Real-time monitoring on the cyclooctene epoxidation by one-step for catalyst **1**. (A)  $\text{H}_3\text{PW}_{12}\text{O}_{40}$  (0.005 mmol),  $\text{H}_2\text{O}_2$  (1 mmol) and cyclooctene (1 mmol) dissolved in  $\text{CH}_3\text{CN}$ ; (B) stirring 5 min at 50 °C; (C) stirring 30 min; (D) stirring 1 h; (E) stirring 4 h.

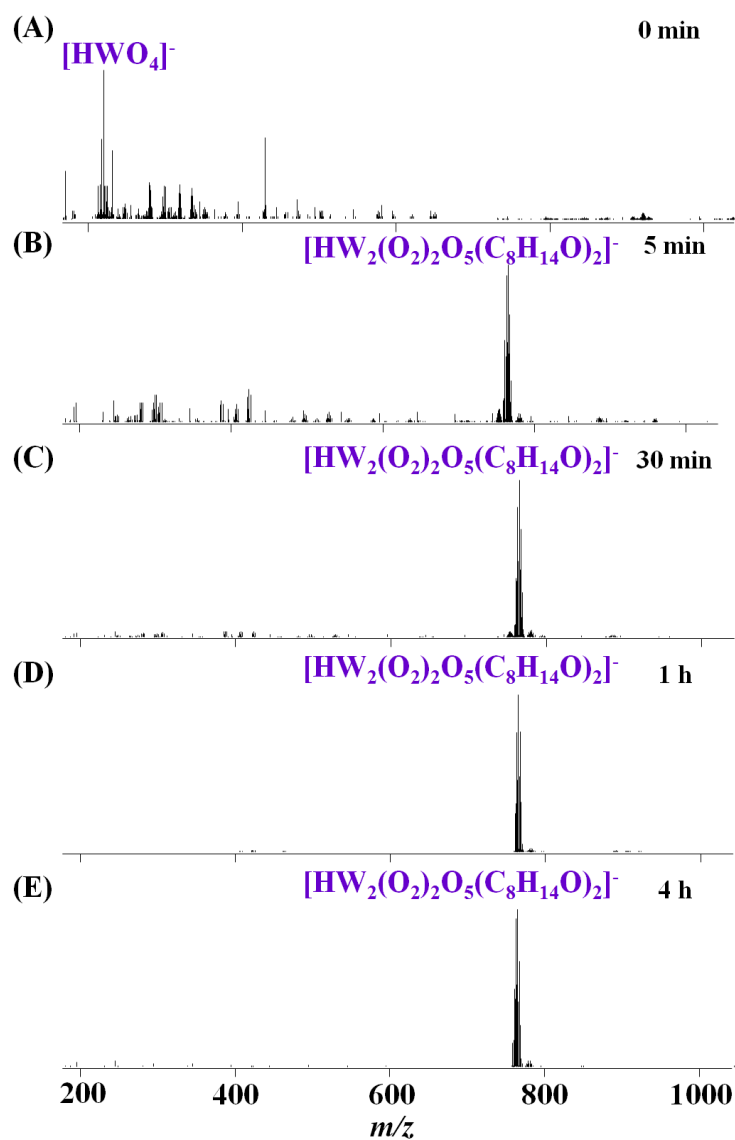

**Fig. S7** Real-time monitoring on the cyclooctene epoxidation by one-step for catalyst **2**. (A)  $\text{H}_2\text{WO}_4$  (0.06 mmol),  $\text{H}_2\text{O}_2$  (1 mmol) and cyclooctene (1 mmol) dissolved in  $\text{CH}_3\text{CN}$ ; (B) stirring 5 min at 50 °C; (C) stirring 30 min; (D) stirring 1 h; (E) stirring 4 h.



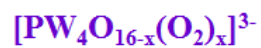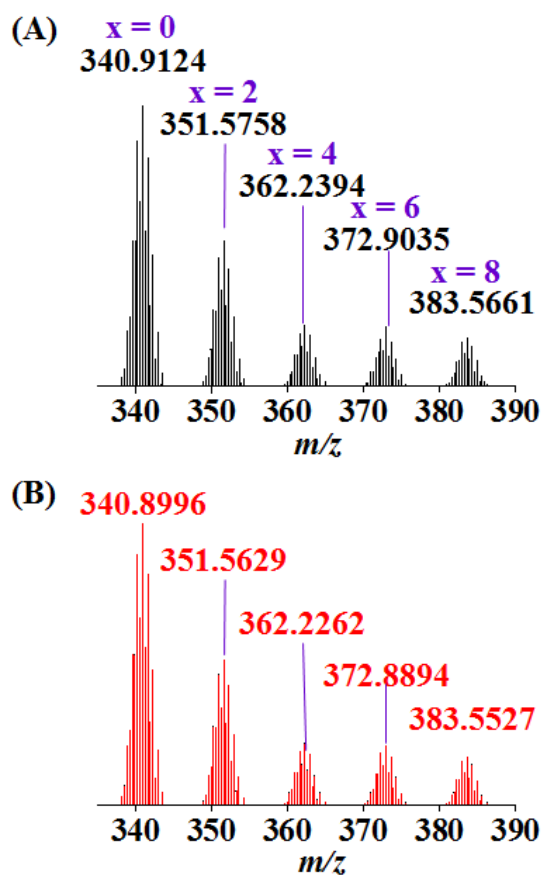

**Fig. S8** The comparison of MS spectra of  $[\text{PW}_4\text{O}_{16-x}(\text{O}_2)_x]^{3-}$  ( $x = 0$ ,  $m/z$  340.9;  $x = 2$ ,  $m/z$  351.6;  $x = 4$ ,  $m/z$  362.2;  $x = 6$ ,  $m/z$  372.9;  $x = 8$ ,  $m/z$  383.6). (A) Observed; (B) Calculated.

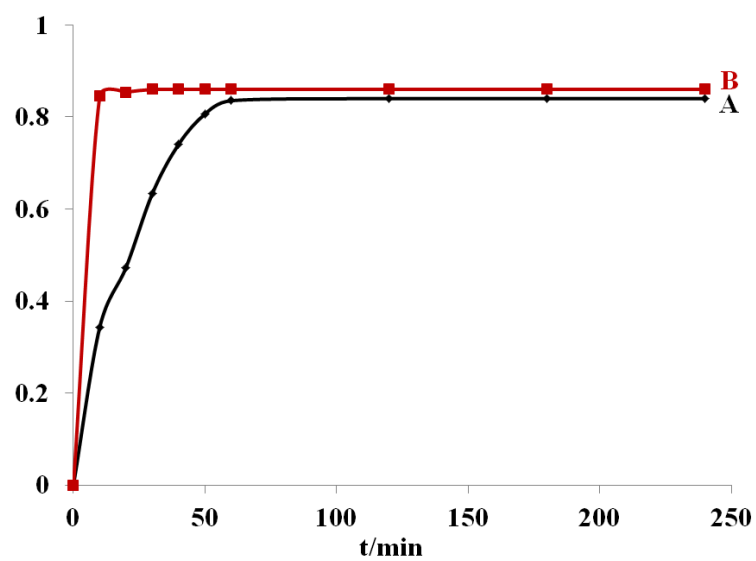

**Fig. S9** The conversion-time curve of cyclooctene in system 1. (A) cyclooctene,  $\text{H}_2\text{O}_2$  and  $\text{H}_3\text{PW}_{12}\text{O}_{40}$  was added into  $\text{CH}_3\text{CN}$  at the same time. (B) After  $\text{H}_2\text{O}_2$  and  $\text{H}_3\text{PW}_{12}\text{O}_{40}$  was added into  $\text{CH}_3\text{CN}$  and mixed at  $50\text{ }^\circ\text{C}$  for 4 h, cyclooctene was added to the mixture.

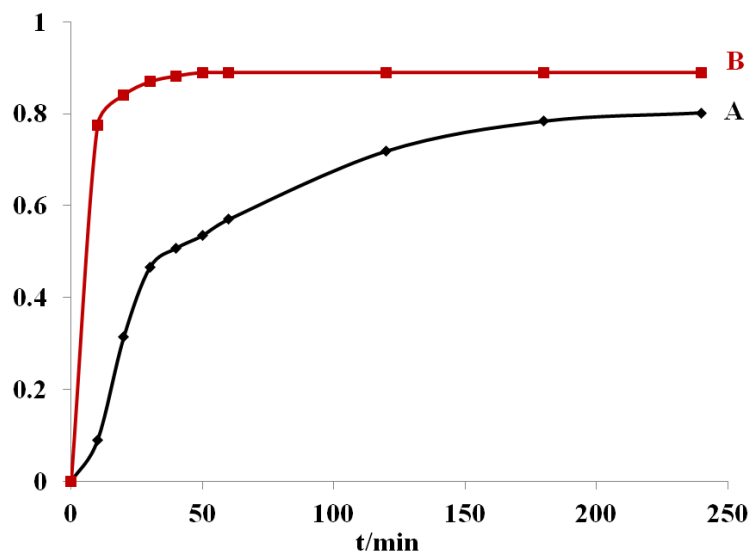

**Fig. S10** The conversion-time curve of cyclooctene in system 2. (A) cyclooctene,  $\text{H}_2\text{O}_2$  and  $\text{H}_2\text{WO}_4$  was added into  $\text{CH}_3\text{CN}$  at the same time. (B) After  $\text{H}_2\text{O}_2$  and  $\text{H}_2\text{WO}_4$  was added into  $\text{CH}_3\text{CN}$  and mixed at  $50\text{ }^\circ\text{C}$  for 4 h, cyclooctene was added to the mixture.
